# Supplementary material for: Predicting maximal oxygen uptake from a 3-minute progressive knee-ups and step test
Source: PeerJ. 2021 Mar 15;9:e10831. doi: 10.7717/peerj.10831 (PMC7971079; doi:10.7717/peerj.10831)
Supplement: Supplemental Information 1 [file peerj-09-10831-s001.xlsx]

## Sheet: 工作表1
data set	no.	age	gender	height	weight	body fat	HR0	HR1	HR2	HR2	HR4	VO2max
train	1	22	1	177.8	70	12.9	66	96	112	141	114	58.8279
train	2	22	0	164	48.9	22.3	100	113	136	171	166	38.3753
train	3	22	0	161	47.7	27.6	103	124	149	161	154	43.4804
train	4	23	1	179.5	78	18	98	111	145	160	148	49.8776
train	5	23	1	187.6	100.8	18.2	81	107	132	157	143	38.7266
train	6	23	0	160	55.8	28.2	97	115	134	172	171	36.8045
train	7	23	1	180.4	102.1	19.3	69	102	128	174	106	44.5181
train	8	23	0	154	51.8	14.3	89	121	135	172	152	47.7898
train	9	24	1	176.4	76.5	16.9	79	97	137	184	162	49.6206
train	10	24	1	177.7	71.5	10.6	79	98	125	141	140	51.1904
train	11	25	1	179.2	117	30.5	107	113	131	159	157	34.7587
train	12	28	1	179.5	77.4	24	89	97	117	147	128	44.2298
train	13	29	0	159.5	83.9	42.2	63	105	123	151	141	31
train	14	30	0	166.6	81	40.8	103	108	157	163	166	24
train	15	33	0	166.4	63.8	32.7	75	93	118	162	163	29
train	16	34	0	161.5	65.5	31.2	76	105	123	152	157	31
train	17	34	0	163.3	58.3	32.5	88	102	130	176	172	33
train	18	34	1	170	100.1	35.2	101	127	150	186	169	22
train	19	34	1	165	91.8	32.9	73	112	126	146	116	37.2
train	20	35	0	160.7	49.4	30.3	95	105	129	165	152	30.98
train	21	35	0	154	53.9	32.2	79	125	148	174	154	29
train	22	35	0	160	67.8	35.7	114	142	166	182	165	29
train	23	35	1	170	72.1	24.3	94	106	119	145	123	45.2
train	24	35	0	163	53.5	26.1	69	91	108	138	107	44.2
train	25	36	0	164.8	56.8	17.2	80	93	122	152	145	38
train	26	36	0	171.2	52	16.1	69	122	150	161	157	38.78
train	27	36	0	154.4	49.6	25.5	89	128	156	183	188	33.87
train	28	36	1	171	67	23.8	94	111	125	150	152	42
train	29	36	0	155	67.3	42.2	98	123	143	162	149	25
train	30	37	0	161	46.5	16.3	77	88	105	130	142	31.53
train	31	37	0	157	45.2	30.4	88	112	138	177	149	28
train	32	37	1	172	73	19.9	58	97	115	144	114	40
train	33	37	0	162	53.5	27.8	105	127	151	170	149	28
train	34	37	1	166	90.2	39.3	88	122	141	163	146	44.4
train	35	37	0	161	66.9	32.4	84	120	145	168	148	35.5
train	36	38	0	159.2	51.8	23.5	111	124	133	162	159	34
train	37	38	0	162	61.3	39.5	101	117	144	155	169	25.69
train	38	38	1	174	79.8	27	97	122	143	162	133	44
train	39	38	1	173	85.5	23.6	76	92	102	155	123	33
train	40	38	1	172	79.7	24.1	85	112	122	170	146	35
train	41	39	0	165.7	76	42.2	82	115	139	160	155	26
train	42	39	0	155.4	61.2	37	89	108	126	146	152	31
train	43	39	0	158.9	47.9	26.8	86	111	125	166	165	27.01
train	44	39	0	169	55.1	23.5	70	102	130	150	115	36
train	45	39	1	173	67.1	23.2	77	99	110	136	96	37
train	46	39	1	169	62.6	22.7	104	110	130	156	144	33
train	47	39	0	158	50.1	24.3	83	111	124	149	113	40
train	48	39	0	158	86.2	42.2	98	111	128	156	145	31
train	49	40	0	161.9	57.9	23.2	82	110	134	157	139	31
train	50	40	0	164.5	57.2	27.2	112	142	162	187	179	23.78
train	51	40	0	165.7	51.7	23	102	133	151	174	169	32.76
train	52	40	0	158.4	71.7	38.2	76	110	128	157	147	27.48
train	53	40	1	174	100.8	23.6	85	108	126	144	126	29
train	54	40	1	175	81	24	76	98	111	137	127	56.7
train	55	40	0	156	49.2	32.3	71	117	139	161	144	36.9
train	56	40	1	178	81	18.1	69	89	110	136	102	51.2
train	57	41	1	174.1	98.1	35.9	93	121	153	186	164	28.76
train	58	41	0	162	52.9	27.8	83	111	134	152	123	32
train	59	42	0	158.9	69.9	39.9	97	104	125	149	162	24.48
train	60	42	0	167	60.5	25	74	99	121	160	116	45
train	61	42	0	156	59.8	35.7	72	114	148	152	152	29
train	62	42	1	175	69.4	20.5	91	98	117	143	128	33
train	63	43	0	167.1	72.5	34.1	73	97	119	155	168	28.57
train	64	43	0	160.1	54.1	24.8	88	101	120	156	147	33.32
train	65	43	0	161.6	62.3	31.1	87	106	128	148	139	23.88
train	66	43	1	172	65.7	15.1	87	108	134	160	146	38
train	67	43	1	169	61.9	20.9	73	104	133	162	140	40
train	68	43	0	165	66.5	26.2	88	127	157	171	150	29
train	69	43	0	165	69	33.3	90	116	143	165	144	29
train	70	43	0	160	64.8	32.6	99	123	143	149	153	24
train	71	43	0	167	64.2	31.6	99	120	147	175	153	33.4
train	72	44	0	166.4	59.1	26.9	107	117	134	163	149	35.13
train	73	44	0	162	71.5	37	81	106	145	162	133	29
train	74	44	0	160	70.1	39.2	103	135	161	176	157	20
train	75	44	0	157	63	34	81	101	117	137	106	24
train	76	44	0	161	61	35.5	84	100	118	169	166	37.5
train	77	44	1	170	78.4	33.1	84	112	132	154	143	35.5
train	78	45	1	171.3	68.2	18.5	78	97	115	141	127	41.83
train	79	45	0	157	61.9	36	77	105	141	171	144	27.5
train	80	46	0	165.5	84.7	41.7	88	110	132	159	161	24.53
train	81	46	1	169	62.6	23	86	133	155	182	164	36
train	82	47	1	173.5	67.2	23.4	99	110	135	160	157	36
train	83	47	0	156.9	58.8	34.8	90	100	130	159	141	31.98
train	84	47	1	168	61.1	15.1	82	112	131	156	131	46
train	85	47	1	176	85.6	27	81	102	115	133	120	45.3
train	86	47	1	150	50.1	15.4	77	107	126	139	122	45.3
train	87	48	0	163.5	59.7	34.8	75	88	104	126	114	25
train	88	48	0	154.1	57.6	34.6	92	104	125	163	149	26
train	89	48	1	172	72	15.4	81	102	114	142	120	43
train	90	49	0	160.2	68.1	38.1	84	127	161	177	171	25
train	91	49	1	171	64.4	14.3	70	87	104	122	100	52
train	92	49	1	169	75	24	66	90	113	138	121	48.3
train	93	50	0	161.3	50.9	25.8	117	148	159	167	157	33
train	94	50	0	157.8	58.4	32.1	82	100	109	152	132	34.71
train	95	50	0	150.3	46.3	28	86	109	133	155	149	24.71
train	96	50	0	147.1	44.4	29.1	75	91	106	129	153	29.1
train	97	50	0	155.6	58.1	33.5	88	122	146	167	156	26.6
train	98	50	0	154.3	48.6	36.7	99	129	151	172	164	21.86
train	99	50	0	166	54.7	27	92	129	141	163	155	28
train	100	50	0	161	55.7	25	119	138	151	174	181	27
train	101	51	0	158.4	45.9	18.4	101	120	140	159	159	36.76
train	102	51	0	152.7	68.9	36.8	103	124	149	162	147	28.03
train	103	51	0	147	41.4	19.9	88	100	119	154	111	35
train	104	51	1	178	71	23.6	97	112	129	163	153	43.6
train	105	51	1	165	81.7	37.7	73	101	116	137	122	35.9
train	106	52	0	158	52	37.7	110	130	155	176	137	29
train	107	52	0	150	47	27.2	88	111	127	155	142	23
train	108	53	0	158.4	54.3	21.5	103	131	167	180	174	29.3
train	109	53	1	170	68.5	14.8	63	87	107	126	109	38
train	110	53	0	156	50	33.1	84	134	155	158	129	28
train	111	53	0	156	56.1	29.3	72	111	143	160	147	29.4
train	112	54	0	153.2	58.1	34.3	79	96	119	156	155	31
train	113	54	0	163	68.7	37.4	86	103	116	141	122	20
train	114	55	1	182	71.9	21.4	101	121	131	165	134	31.9
train	115	56	0	154.5	53.5	28.6	79	109	122	143	122	30
train	116	56	1	174	74.1	18.2	68	89	106	127	94	49.6
train	117	57	1	164	67.3	23.4	64	109	130	169	138	37.3
train	118	58	0	154.5	57.7	31.6	104	118	141	160	150	31.19
train	119	58	0	164	57.2	28.2	81	94	107	137	150	26.69
train	120	58	1	165	59.7	21.3	69	101	125	151	127	30
train	121	58	0	163	65.6	34	74	119	147	162	145	28.2
train	122	59	1	170	77.8	26.7	72	98	123	149	132	29
train	123	60	0	155.1	47.9	24.8	71	104	124	157	144	35.69
train	124	66	0	165.3	60.8	24.1	72	85	105	133	149	25.69
test	125	22	1	184.5	78.2	7.2	81	99	127	158	170	53.8541
test	126	22	0	158.8	57.9	26.6	88	102	111	141	118	36.2617
test	127	23	1	170.8	65.6	17	81	109	122	159	122	52.8437
test	128	23	1	178	64.3	13.2	112	121	150	163	158	47.5499
test	129	24	1	177.8	70.7	13.8	98	106	128	156	137	50.9101
test	130	26	1	177.6	64.3	12.1	94	110	137	153	132	51.6188
test	131	26	0	159.9	59.5	32.2	100	120	153	147	155	48.2884
test	132	29	1	165	70.3	22.5	87	101	127	165	143	41
test	133	32	0	158.1	73.4	43.6	97	109	133	156	168	30
test	134	35	0	158	72.7	43.1	100	123	143	178	176	19
test	135	36	0	157	59.3	38	84	109	120	146	125	36.8
test	136	37	0	162	48.8	18.1	80	95	109	141	114	50
test	137	37	1	176	70.7	22	74	89	114	154	149	46.9
test	138	38	1	184.6	83	19.4	94	121	156	172	165	36.91
test	139	38	0	158	70.2	38.9	79	109	129	163	149	26
test	140	38	1	168	64.9	26.4	77	95	115	145	94	36.5
test	141	39	1	176	75.8	28	112	136	147	166	155	30.6
test	142	40	1	169.4	61.2	17.6	73	103	120	141	109	55.38
test	143	40	0	152	52.4	35.9	112	116	139	167	152	28
test	144	40	0	160	63.3	32.8	84	99	123	163	146	30
test	145	41	1	182	110.2	34.1	92	121	142	167	149	35.99
test	146	42	1	172	77.2	30.1	85	117	146	168	152	26
test	147	42	0	166	47.1	23.8	93	115	128	151	139	25
test	148	42	0	168	61	29.7	85	137	168	185	165	23
test	149	43	1	169	81.7	32	85	104	116	150	128	24
test	150	44	0	155	47.7	27	100	129	145	171	159	34
test	151	44	0	155	74.2	40.5	69	85	98	154	106	24
test	152	44	1	170	80.6	31.8	81	106	129	162	141	48.8
test	153	45	0	153.1	51.9	30.5	93	117	153	180	163	25.49
test	154	45	0	162	65.3	29.5	99	114	145	172	161	26
test	155	50	0	160.6	64.6	32.5	79	101	125	160	152	29.93
test	156	50	0	161	59.1	32.7	88	106	139	165	145	32.5
test	157	51	0	160	63.2	33	65	85	95	138	113	25
test	158	51	0	152	63.9	40.8	60	79	105	137	126	29.2
test	159	52	1	176.3	76.9	24.4	81	127	160	182	169	37.18
test	160	52	0	158.3	59.1	39.6	81	110	137	158	147	23.22
test	161	53	1	161.3	60.1	25.2	78	88	111	139	112	38
test	162	54	1	172	79.2	29.4	92	100	121	146	149	34.8
test	163	55	1	170	66.7	23.9	80	112	139	162	136	36.6
test	164	55	0	164.6	49.6	27.9	75	96	114	134	111	30.9
test	165	56	1	167	56.4	18.1	63	86	103	127	109	31
test	166	56	1	178	85.5	25.3	82	97	116	140	136	46.6
